# Supplementary material for: Discovery of novel virus sequences in an isolated and threatened bat species, the New Zealand lesser short-tailed bat (Mystacina tuberculata)
Source: PubMed Central journal article supplement (PMC4681071; doi:10.1099/vir.0.000158), 2015-08
Supplement: vir-96-08-2442-s001.pdf [file vir-96-08-2442-s001.pdf]

**Table S1.** RAPSearch2 similarity statistics for reads matching other vertebrate virus in New Zealand lesser short-tailed bats.

| Virus                       | Read_ID                                      | Contigs / Read Length (bp)                     | Score | e-value | % query identity | % query coverage | Best hit  | Gene                                                                              |                                                                    |
|-----------------------------|----------------------------------------------|------------------------------------------------|-------|---------|------------------|------------------|-----------|-----------------------------------------------------------------------------------|--------------------------------------------------------------------|
| Adenovirus                  | M00933:46:000000000-A2BMW:1:105:9416:7977/1  | 250                                            | 85.9  | 2.E-18  | 49               | 94               | AP_000407 | ORF1[3]Fowl adenovirus A]                                                         |                                                                    |
|                             | M00933:46:000000000-A2BMW:1:105:9416:7977/2  | 250                                            | 99    | 4.E-23  | 51               | 99               | AP_000407 | ORF1[3]Fowl adenovirus A]                                                         |                                                                    |
|                             | M00933:46:000000000-A2BMW:1:110:9837:12704/2 | 250                                            | 76.3  | 6.E-15  | 57               | 69               | AP_000407 | ORF1[3]Fowl adenovirus A]                                                         |                                                                    |
| Molluscum contagiosum virus | Contigs 1                                    | 583                                            | 296   | 5.E-46  | 90               | 82               | AAB57956  | similar to variola H8R and vaccinia G8R [Molluscum contagiosum virus subtype 1]   |                                                                    |
|                             | Contigs 2                                    | 809                                            | 431   | 2.E-51  | 76               | 95               | AAB57958  | similar to variola M1R and vaccinia L1R [Molluscum contagiosum virus subtype 1]   |                                                                    |
|                             | Contigs 3                                    | 575                                            | 262   | 8.E-40  | 79               | 76               | NP_044051 | MC100R [Molluscum contagiosum virus subtype 1]                                    |                                                                    |
|                             | Contigs 4                                    | 448                                            | 106   | 2.E-25  | 53               | 68               | NP_044073 | MC122L [Molluscum contagiosum virus subtype 1]                                    |                                                                    |
|                             | Contigs 7                                    | 611                                            | 354   | 6.E-72  | 77               | 99               | AAB57999  | similar to variola A25R and vaccinia A24R [Molluscum contagiosum virus subtype 1] |                                                                    |
|                             | Contigs 8                                    | 476                                            | 122   | 8.E-29  | 86               | 41               | NP_044080 | MC129R [Molluscum contagiosum virus subtype 1]                                    |                                                                    |
|                             | Contigs 9                                    | 382                                            | 89.4  | 2.E-19  | 93               | 33               | AAB57949  | similar to variola and vaccinia E4L [Molluscum contagiosum virus subtype 1]       |                                                                    |
|                             | Contigs 14                                   | 281                                            | 93.2  | 7.E-20  | 56               | 99               | NP_044051 | MC100R [Molluscum contagiosum virus subtype 1]                                    |                                                                    |
|                             | Contigs 15                                   | 445                                            | 156   | 9.E-22  | 53               | 99               | BAA25417  | 70-kDa protein [Molluscum contagiosum virus]                                      |                                                                    |
|                             | Contigs 16                                   | 411                                            | 177   | 3.E-35  | 54               | 99               | NP_044041 | MC090R [Molluscum contagiosum virus subtype 1]                                    |                                                                    |
|                             | Contigs 17                                   | 401                                            | 249   | 4.E-75  | 86               | 99               | NP_044045 | MC094R [Molluscum contagiosum virus subtype 1]                                    |                                                                    |
|                             | Contigs 18                                   | 392                                            | 193   | 8.E-35  | 54               | 100              | NP_044038 | MC087R [Molluscum contagiosum virus subtype 1]                                    |                                                                    |
|                             | Contigs 19                                   | 389                                            | 99.8  | 3.E-22  | 62               | 59               | NP_044079 | MC128R [Molluscum contagiosum virus subtype 1]                                    |                                                                    |
|                             | Contigs 20                                   | 386                                            | 246   | 5.E-75  | 94               | 99               | NP_044046 | MC095R [Molluscum contagiosum virus subtype 1]                                    |                                                                    |
|                             | Contigs 21                                   | 385                                            | 234   | 1.E-70  | 80               | 99               | NP_044051 | MC100R [Molluscum contagiosum virus subtype 1]                                    |                                                                    |
|                             | Contigs 22                                   | 382                                            | 111   | 6.E-27  | 66               | 62               | NP_044023 | MC072L [Molluscum contagiosum virus subtype 1]                                    |                                                                    |
|                             | Contigs 23                                   | 376                                            | 149   | 1.E-40  | 56               | 99               | AAB57954  | similar to variola and vaccinia E9L [Molluscum contagiosum virus subtype 1]       |                                                                    |
|                             | Contigs 24                                   | 375                                            | 141   | 5.E-37  | 64               | 81               | NP_043982 | MC051L [Molluscum contagiosum virus subtype 1]                                    |                                                                    |
|                             | Contigs 25                                   | 363                                            | 242   | 3.E-72  | 93               | 100              | NP_044041 | MC090R [Molluscum contagiosum virus subtype 1]                                    |                                                                    |
|                             | Contigs 26                                   | 357                                            | 180   | 9.E-37  | 87               | 95               | NP_044036 | MC085L [Molluscum contagiosum virus subtype 1]                                    |                                                                    |
|                             | Contigs 27                                   | 349                                            | 184   | 3.E-51  | 85               | 90               | NP_044030 | MC079R [Molluscum contagiosum virus subtype 1]                                    |                                                                    |
|                             | Contigs 28                                   | 346                                            | 100   | 4.E-25  | 73               | 54               | NP_044012 | MC061R [Molluscum contagiosum virus subtype 1]                                    |                                                                    |
|                             | Contigs 30                                   | 339                                            | 208   | 3.E-61  | 85               | 100              | NP_044051 | MC100R [Molluscum contagiosum virus subtype 1]                                    |                                                                    |
|                             | Contigs 34                                   | 305                                            | 112   | 7.E-26  | 51               | 95               | NP_043986 | MC035R [Molluscum contagiosum virus subtype 1]                                    |                                                                    |
|                             | Contigs 35                                   | 294                                            | 90.5  | 7.E-19  | 50               | 77               | AAB58003  | similar to variola A30L and vaccinia A27L [Molluscum contagiosum virus subtype 1] |                                                                    |
|                             | Parvovirus                                   | Contigs                                        | 277   | 55      | 1.E-06           | 41               | 79        | AHA86835                                                                          | Nonstructural protein [Seal parvovirus]                            |
|                             |                                              | M00933:46:000000000-A2BMW:1:2103:21012:5912/2  | 250   | 55.1    | 1.E-06           | 59               | 46        | AAB52734                                                                          | capsid protein[chipmunk parvovirus]                                |
|                             |                                              | M00933:46:000000000-A2BMW:1:2104:22426:10197/2 | 250   | 84.7    | 5.E-17           | 56               | 76        | AGC92300                                                                          | VP1[Human bocavirus]                                               |
|                             | Picornavirus                                 | Contigs 1                                      | 477   | 113     | 3.E-13           | 43               | 74        | AGU62957                                                                          | polyprotein[Ferret parechovirus]                                   |
|                             |                                              | Contigs 3                                      | 567   | 170     | 8.E-48           | 47               | 93        | ADR79388                                                                          | polyprotein[Picoma-like virus Epescius fuscus PS/InLV/TF/USA/2009] |
|                             |                                              | Contigs 4                                      | 571   | 114     | 8.E-27           | 53               | 75        | AIM55450                                                                          | NS, partial [Ancient Northwest Territories cricovirus]             |
|                             |                                              | Contigs 8                                      | 349   | 61.6    | 2.E-08           | 42               | 74        | ABO09966                                                                          | polyprotein [Duck hepatitis virus 2 strain 90D]                    |
|                             |                                              | Contigs 9                                      | 331   | 65.9    | 3.E-10           | 53               | 48        | AIM55450                                                                          | NS, partial [Ancient Northwest Territories cricovirus]             |
|                             |                                              | Contigs 11                                     | 294   | 52      | 2.E-05           | 45               | 47        | AFR11852                                                                          | polyprotein [Salivirus sewage Bangkok]                             |

**Table S2.** Primer pairs used for amplification of target viral genes.

| <b>Virus</b>   | <b>Target gene</b>        | <b>Forward primer name</b> | <b>Forward Primer Sequence</b> | <b>Reverse Primer Name</b> | <b>Reverse Primer Sequence</b> | <b>Product size (bp)</b> |
|----------------|---------------------------|----------------------------|--------------------------------|----------------------------|--------------------------------|--------------------------|
| Papillomavirus | Major capsid protein (L1) | Papillomavirus_L1_423F     | CCCTGGTGTATCCCAACC             | Papillomavirus_L1_941R     | AGCTGGGGAGTATTGGACT            | 517 / 522                |
| Polyomavirus   | Viral protein 1           | Polyvirus_VP1_375 F        | GGCTGTTTGTTCGCTGCA             | Polyvirus_VP1_561 R        | TGCCCTCCACTAGGCAT              | 187                      |
| Calicivirus    | Major capsid protein      | Cal56F                     | GATCGTTCAACGTTGCCACC           | Cal357R                    | GTCTGGGGTGTGAACATGA            | 302                      |
|                | Helicase-like protein     | Cal36F                     | ACAGCAGCAGATGTTTCAGT           | Cal269R                    | TCCACGTACTGGCAAAGATGAA         | 234                      |
| Hepevirus      | Helicase protein          | HEV6F                      | GTTTCGCTAACGCCCATACC           | HEV215R                    | ATATGCCTCCGCTACAGGC            | 211                      |

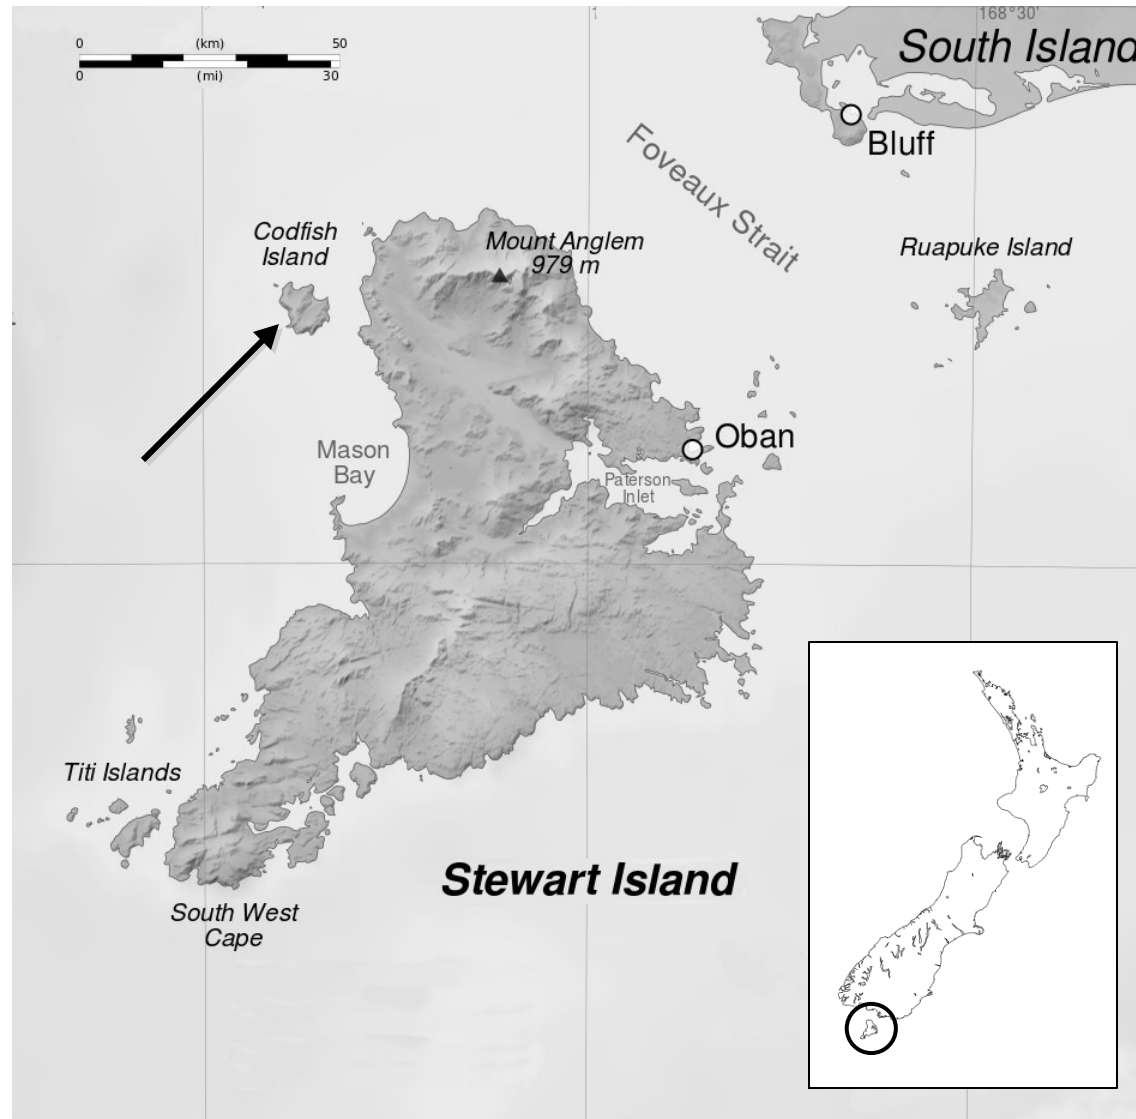

**Fig. S1.** Location of Whenua hou / Codfish Island. Map of New Zealand showing the location of Codfish Island / Whenua hou where bat guano samples were collected. *Mystacina tuberculata* is currently the sole terrestrial mammalian species (except for humans).
